# Supplementary material
Source: ML conference proceedings conference paper supplement (https://openaccess.thecvf.com/content/ICCV2025/html/Zhou_UniRes_Universal_Image_ICCV_2025_paper.html)
Supplement: Supplementary file 1 [file Zhou_UniRes_Universal_Image_ICCV_2025_supplemental.pdf]

# UniRes: Universal Image Restoration for Complex Degradations

Mo Zhou<sup>1,2\*</sup> Keren Ye<sup>1</sup> Mauricio Delbracio<sup>1</sup> Peyman Milanfar<sup>1</sup> Vishal M. Patel<sup>2</sup> Hossein Talebi<sup>1</sup>  
<sup>1</sup>Google <sup>2</sup>Johns Hopkins University

## A. More Experiments and Discussions

### A.1. Why Specifically Four Degradation Types?

In this paper, we particularly focus on complex degradation, an arbitrary mixture of four fundamental degradation types: low resolution, motion blur, defocus blur, and real noise. Those degradations stem from capture condition, capture device and post-processing pipelines. This background is clarified in the manuscript, including the abstract and the first paragraph of the introduction section.

Apart from the four types of degradations, in the low-level vision literature, there are other types of degradations such as rain, haze, fog, and snow. These degradations are not caused by capture device or post-processing pipelines, and hence are not included in the scope of this paper. The effectiveness of our method on these types of degradations is left for future study.

### A.2. Time Complexity and Search Space

As mentioned in the "Implementation Details" in the paper, the default search space parameters for UniRes are  $(\gamma, \delta) = (-0.2, 1.2)$ , with an interval of 0.2. Namely, each weight  $w_i$  has  $n = 7$  possible values (i.e.,  $-0.2, 0.0, 0.2, 0.4, 0.6, 0.8, 1.0, 1.2$ ). Additionally, the weights should sum to one, i.e.,  $\sum_{i=1}^K w_i = 1.0$ , and only one negative value is allowed among  $w_i, i = 1, \dots, K$ . While the complexity of the grid search algorithm is  $O(n^K)$ , the concrete size of the search space is not  $n^K$  due to the two constraints. The search space size in the default settings is 1512. We provide a Python snippet below for the search space and constraints.

```
1 from typing import *
2 import numpy as np
3 import itertools as it
4
5 def search_grid(vmin: float = -0.2,
6                vmax: float = 1.2,
7                nvars: int = 6,
8                interval: float = 0.2,
9                ) -> List[List[float]]:
10     """
11     Find all valid possible combination weights.
```

\*Work done during internship at Google LLC.

```
"""
values = np.arange(vmin, vmax + 1e-3, interval)
allcombs = it.product(*([values] * nvars))
allcombs = [np.array(x) for x in allcombs]
# figure out valid combinations
validcombs = []
for x in allcombs:
    if not np.abs(1 - np.sum(x)) < 1e-5:
        # they must sum to one
        continue
    elif not np.count_nonzero(x < -1e-5) <= 1:
        # no more than one negative value
        continue
    else:
        # this one is valid
        validcombs.append(x.tolist())
print('Valid Combinations:', len(validcombs))
return validcombs

if __name__ == '__main__':
    validcombs = search_grid(-0.2, 1.2)
```

### A.3. Detailed Results on DiversePhotos $\times$ 1

The grid search algorithm for optimization has an exponential complexity. The search space size given the default setting of UniRes is 1512. The inference time of UniRes per image for a given set of combination weights is  $2.332 \pm 0.005s$  on JAX/TPUV5. MUSIQ takes 0.1s per image on CPU. The full experimental details on DiversePhotos $\times$ 1, including the total inference time per image is shown in Tab. 1. Two potential speed-up methods are discussed in the manuscript, and they are also included in this table. Some other related works, including AutoDIR [10] are not compared in the paper due to space limit, and their performance lagging behind the other methods such as DiffBIR [15] and SUPIR [21] by a margin. The PromptIR [18] is advertized as "all-in-one" image resotration, but the official model only support denoise, derain, and dehaze.

Potential future directions for accelerating the proposed method includes, but are not limited to (1) distillation for single-step inference, (2) caching mechanisms, (3) better degradation-aware image features and combination weight prediction. They are beyond the scope of this paper, so we leave them for future explorations.

| Method            | Combination Weights                         | Platform            | Inference Time per image (seconds)       | ClipIQA | MUSIQ | ManIQA |
|-------------------|---------------------------------------------|---------------------|------------------------------------------|---------|-------|--------|
| SwinIR [14]       | N/A                                         | PyTorch/Nvidia A100 | $0.374 \pm 0.063$                        | 0.3727  | 49.26 | 0.3008 |
| Restormer [22]    | N/A                                         | PyTorch/Nvidia A100 | $0.132 \pm 0.035$                        | 0.3407  | 41.80 | 0.2243 |
| PromptIR [18]     | N/A                                         | PyTorch/Nvidia A100 | $0.136 \pm 0.032$                        | 0.3069  | 36.20 | 0.1950 |
| AirNet [13]       | N/A                                         | PyTorch/Nvidia A100 | $0.074 \pm 0.033$                        | 0.3031  | 35.93 | 0.1893 |
| AutoDIR [10]      | N/A                                         | PyTorch/Nvidia A100 | $10.633 \pm 15.909$                      | 0.3260  | 40.32 | 0.2147 |
| NAFNet [4]        | N/A                                         | PyTorch/Nvidia A100 | $0.023 \pm 0.007$                        | 0.3372  | 43.62 | 0.2323 |
| StableSR [20]     | N/A                                         | PyTorch/Nvidia A100 | $11.002 \pm 0.171$                       | 0.6277  | 61.39 | 0.3992 |
| DiffBIR [15]      | N/A                                         | PyTorch/Nvidia A100 | $6.522 \pm 0.034$                        | 0.6453  | 59.97 | 0.4922 |
| SUPIR [21]        | N/A                                         | PyTorch/Nvidia A100 | $15.601 \pm 0.629$                       | 0.5060  | 51.68 | 0.3745 |
| DACLIP-IR [16]    | N/A                                         | PyTorch/Nvidia A100 | $4.940 \pm 0.064$                        | 0.3497  | 46.16 | 0.2567 |
| RAM-SwinIR [19]   | N/A                                         | PyTorch             | N/A                                      | 0.3367  | 40.25 | 0.2842 |
| RAM-PromptIR [19] | N/A                                         | PyTorch             | N/A                                      | 0.3110  | 36.55 | 0.1920 |
| UniRes            | Grid search                                 | JAX/TPUv5           | $(2.332 + 0.1) \times 1512 \approx 3677$ | 0.6519  | 68.22 | 0.5021 |
| UniRes            | Most frequent 8 sets of combination weights | JAX/TPUv5           | $(2.332 + 0.1) \times 8 = 19.456$        | 0.6613  | 68.02 | 0.5101 |
| UniRes            | Most frequent 6 sets of combination weights | JAX/TPUv5           | $(2.332 + 0.1) \times 6 = 14.592$        | 0.6633  | 67.92 | 0.5096 |
| UniRes            | Most frequent 4 sets of combination weights | JAX/TPUv5           | $(2.332 + 0.1) \times 4 = 9.728$         | 0.6655  | 67.68 | 0.5095 |
| UniRes            | Most frequent 2 sets of combination weights | JAX/TPUv5           | $(2.332 + 0.1) \times 2 = 4.864$         | 0.6581  | 66.89 | 0.5052 |
| UniRes            | Most frequent 1 set of combination weights  | JAX/TPUv5           | $(2.332 + 0.1) \times 1 = 2.432$         | 0.6590  | 66.44 | 0.5042 |
| UniRes            | Average optimal combination weights         | JAX/TPUv5           | $(2.332 + 0.1) \times 1 = 2.432$         | 0.5941  | 62.10 | 0.4266 |
| UniRes            | Random Forest (skip search)                 | JAX/TPUv5           | $0.035 + 2.332 = 2.367$                  | 0.5873  | 61.91 | 0.4257 |

Table 1. Full Quantitative Experimental Details on DiversePhotos $\times 1$ .

#### A.4. More Visualizations and Failure Cases

In this section, we provide additional visualization results on DiversePhotos $\times 1$ , as shown in Fig. 1, and Fig. 2. Some failure cases are shown in Fig. 3. The failures include hallucination, color change, artifacts, and failure to restore some degradations. See the caption of Fig. 3 for details.

#### A.5. Task Weight Sensitivity

We provide examples to demonstrate how the changes in combination weights in Eq. (2) could impact the results. Fig. 4 shows the trade-off effect between super resolution and denoise, where a smooth trade-off between two different effects can be observed by adjusting the combination weights. Fig. 5 shows different results on the same input LQ image when applying different combination weights. Fig. 6 shows the MUSIQ score curves when trading-off every pair of restoration tasks.

The average optimal weight over the DiversePhotos $\times 1$  dataset is (BR=0.07, SR=0.12, MD=0.07, DD=0.06, DN=-0.15, DownLQ=0.83). The denoising task has a negative weight in average largely because the MUSIQ metric prefers sharp images, while the denoiser (the DN=1 case, *i.e.*, the weight for denoising is set to 1, while the rest are set to zero) does not sharpen the given image. So the denoiser is not preferred by MUSIQ in most cases, and the algorithm leans towards using it as a negative classifier-free guidance term [8] to push the latent diffusion prediction to be closer to other high-quality directions. Nevertheless, the denoiser is qualitatively effective as demonstrated by the example in Fig. 4. If the average optimal weight is used for all images from DiversePhotos $\times 1$ , the results are 0.5941, 62.10, 0.4266 for ClipIQA, MUSIQ, and ManIQA, respectively. The most popular optimal weight on the dataset is

| Model                                                    | Task Weights | PSNR  | SSIM   | LPIPS $\downarrow$ | FID $\downarrow$ | ClipIQA | MUSIQ | ManIQA |
|----------------------------------------------------------|--------------|-------|--------|--------------------|------------------|---------|-------|--------|
| DIV2K (3000 Crops from StableSR, size $512 \times 512$ ) |              |       |        |                    |                  |         |       |        |
| StableSR                                                 | -            | 21.94 | 0.5343 | 0.3113             | 24.44            | 0.6771  | 65.92 | 0.4201 |
| DiffBIR                                                  | -            | 21.82 | 0.5050 | 0.3670             | 32.72            | 0.7300  | 69.87 | 0.5667 |
| SUPIR                                                    | -            | 20.85 | 0.4945 | 0.3904             | 31.60            | 0.7134  | 63.69 | 0.5477 |
| DACLIP-IR                                                | -            | 21.93 | 0.4864 | 0.4881             | 71.93            | 0.3295  | 48.68 | 0.2654 |
| SR-Only                                                  | -            | 22.12 | 0.5352 | 0.3028             | 21.17            | 0.6083  | 66.45 | 0.4366 |
| UniRes                                                   | SR=1         | 21.41 | 0.5127 | 0.3325             | 25.99            | 0.6308  | 67.29 | 0.4567 |
| GoPro (1111 Images)                                      |              |       |        |                    |                  |         |       |        |
| UniRes                                                   | MD=1         | 25.04 | 0.7629 | 0.1604             | 11.83            | 0.3073  | 58.65 | 0.2630 |
| DPDD (74 Images)                                         |              |       |        |                    |                  |         |       |        |
| UniRes                                                   | DD=1         | 24.03 | 0.6980 | 0.1678             | -                | 0.5088  | 63.42 | 0.4198 |
| SIDD (1280 Crops, size $256 \times 256$ )                |              |       |        |                    |                  |         |       |        |
| UniRes                                                   | DN=1         | 26.94 | 0.8120 | 0.1821             | -                | 0.2945  | 22.19 | 0.2603 |

Table 2. Evaluation on Well-Isolated Restoration Tasks. In this paper, we focus on complex degradations, instead of these well-isolated degradations.

(DN=-0.2, DownLQ=1.20), where 66 out of 160 images (41.25%) reach the peak MUSIQ value. If this most popular optimal weight is used for all images, the results are 0.6590, 66.44, 0.5042 for ClipIQA, MUSIQ, and ManIQA, respectively.

#### A.6. Evaluation on Well-Isolated Degradations

The focus of this paper is real-world complex degradations, instead of well-isolated degradations. The quantitative evaluation for those well-isolated tasks, such as super-resolution, motion deblur, defocus deblur, and denoise are carried out for sanity testing purpose. We evaluate our model on the validation sets of DIV2K [3]<sup>1</sup>, GoPro [17], DPDD [2], and SIDD [1]. The quantitative metrics can be found in Tab. 2.

<sup>1</sup>[huggingface.co/datasets/Iceclear/StableSR-TestSets](https://huggingface.co/datasets/Iceclear/StableSR-TestSets)



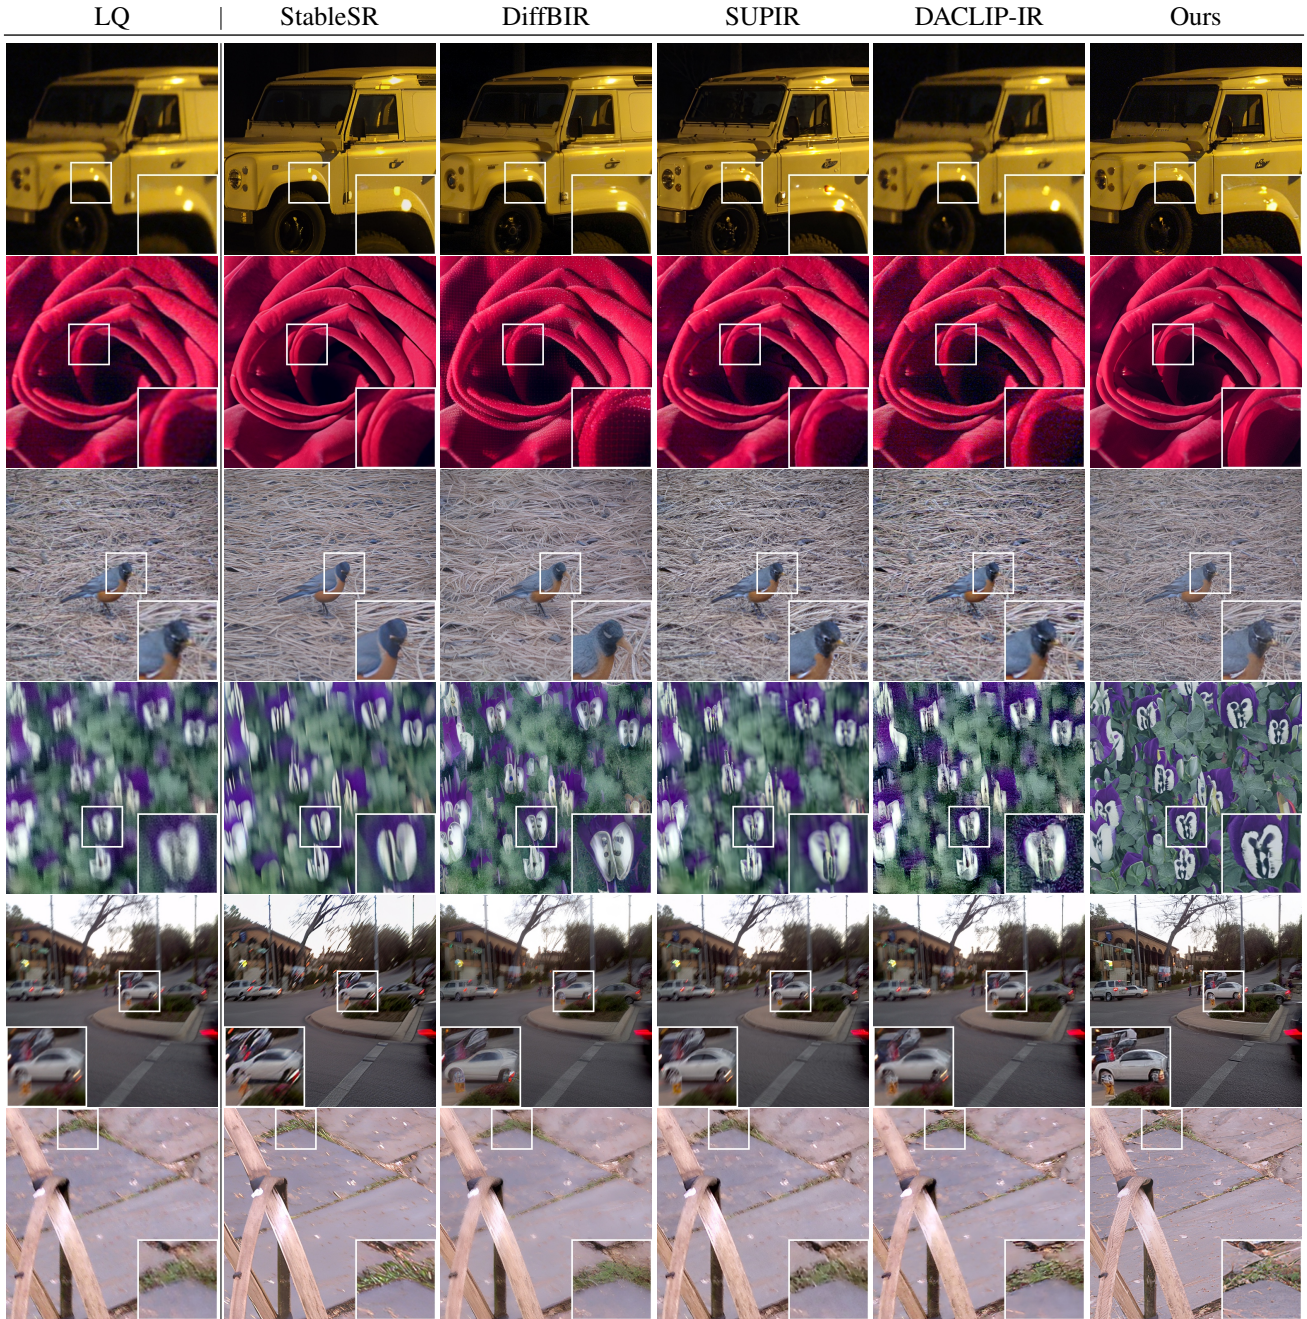

Figure 1. More visualizations about real-world image restoration on the DiversePhotos $\times$ 1 dataset.

### A.7. Positive and Negative Prompts

Recent works [15, 21] demonstrate the effectiveness of positive and negative prompts (e.g., “blur”, “low-quality”, etc.). To make the model correctly understand the negative-quality concepts, [21] explicitly introduce negative-quality images to the training samples. Similarly, to extend our proposed method with positive and negative prompt words, we need to modify the training data pipeline.

In particular, after sampling each training tuple with (LQ image, text prompt, HQ image), there is (1) 1% probability that the text prompt will be replaced with positive-quality words: “*photorealistic, clean, high-resolution, ultra-high definition, 4k detail, 8k resolution, masterpiece, cinematic, highly detailed.*”; (2) 1% probability that the text prompt will be replaced with the negative-quality words: “*oil painting, cartoon, blur, dirty, messy, low quality, deformation, low res-*



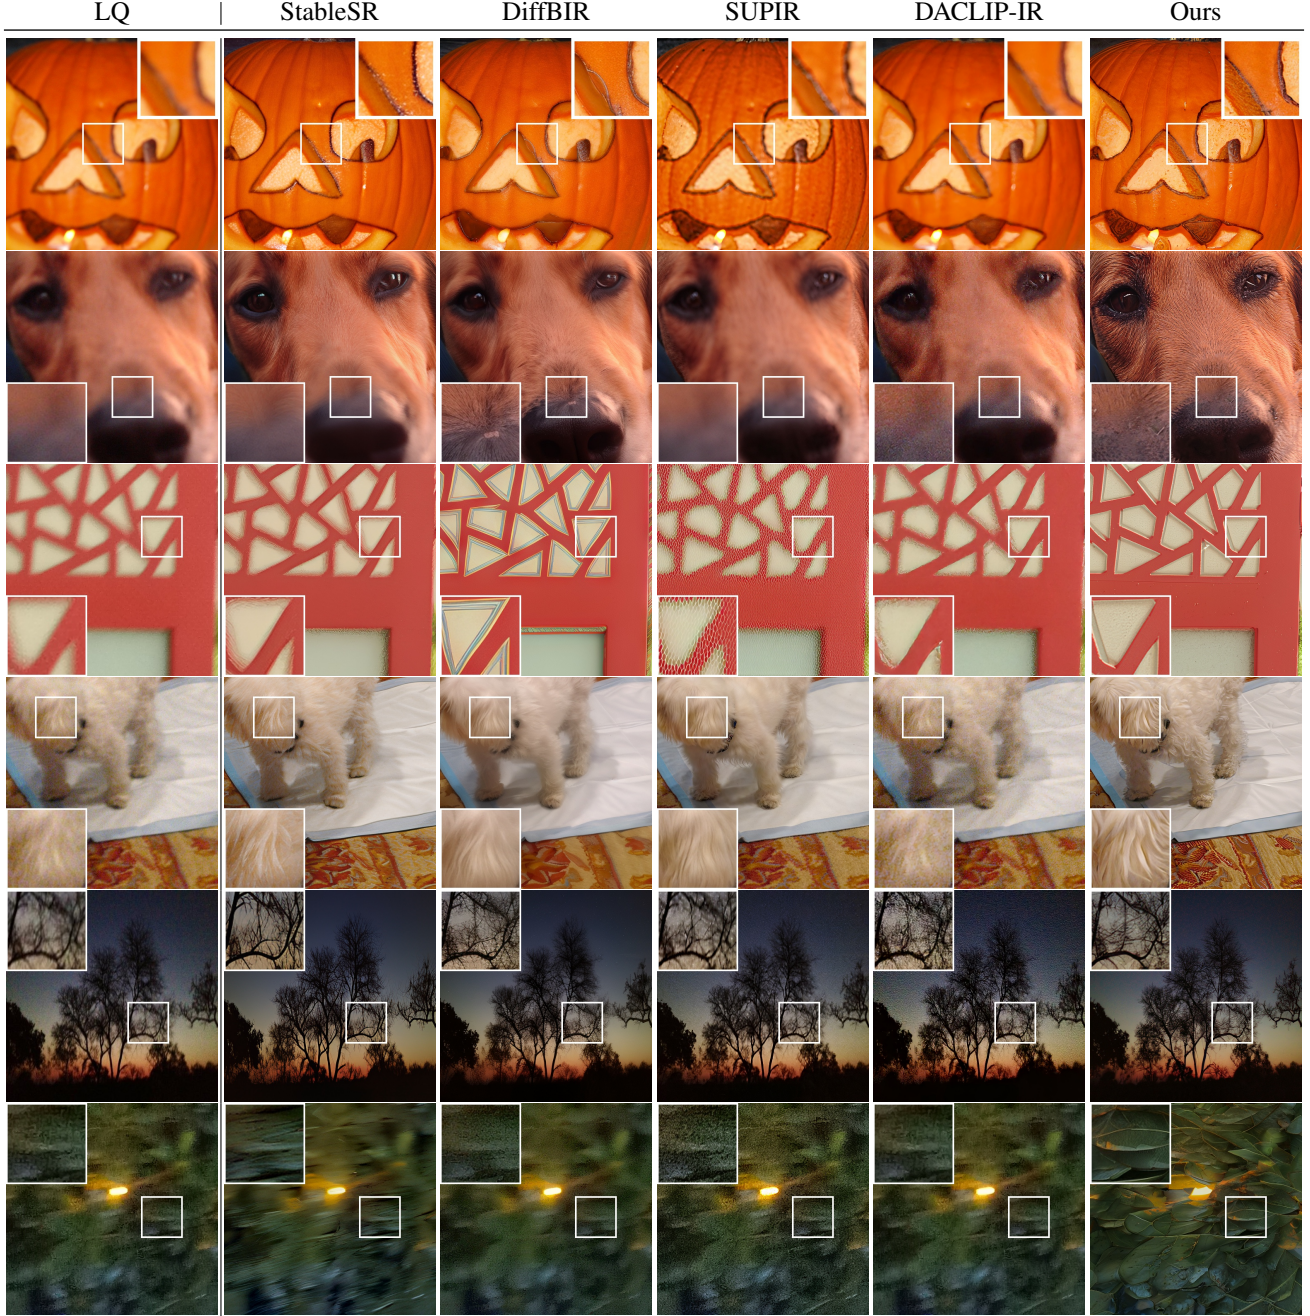

Figure 2. More visualizations about real-world image restoration on the DiversePhotos $\times$ 1 dataset.

olution, over-smooth.”, and meanwhile swap the LQ image and HQ image; (3) 98% probability that the training tuple is left intact. This modification allows the model to properly understand the concept of “positive quality” and “negative quality”, which is similar to the observation in [21].

Then we validate the impact of those positive and negative words on the DiversePhotos $\times$ 1 dataset. In particular, based on the optimal weights obtained by grid search, if

we add the diffusion latent prediction for the positive words  $\epsilon_{\theta}(z_t, z_{LQ}, s_{\text{positive}})$  with weight +1.0, and that for the negative words  $\epsilon_{\theta}(z_t, z_{LQ}, s_{\text{negative}})$  with weight -1.0, the results will be 0.6748, 69.70, 0.5354 for ClipIQA, MUSIQ, and ManIQA, respectively. Comparing to the UniRes results under the default setting (*i.e.*, 0.6519, 68.22, 0.5021), the positive and negative words leads to a slight performance gain. Further increasing the absolute values for their weights



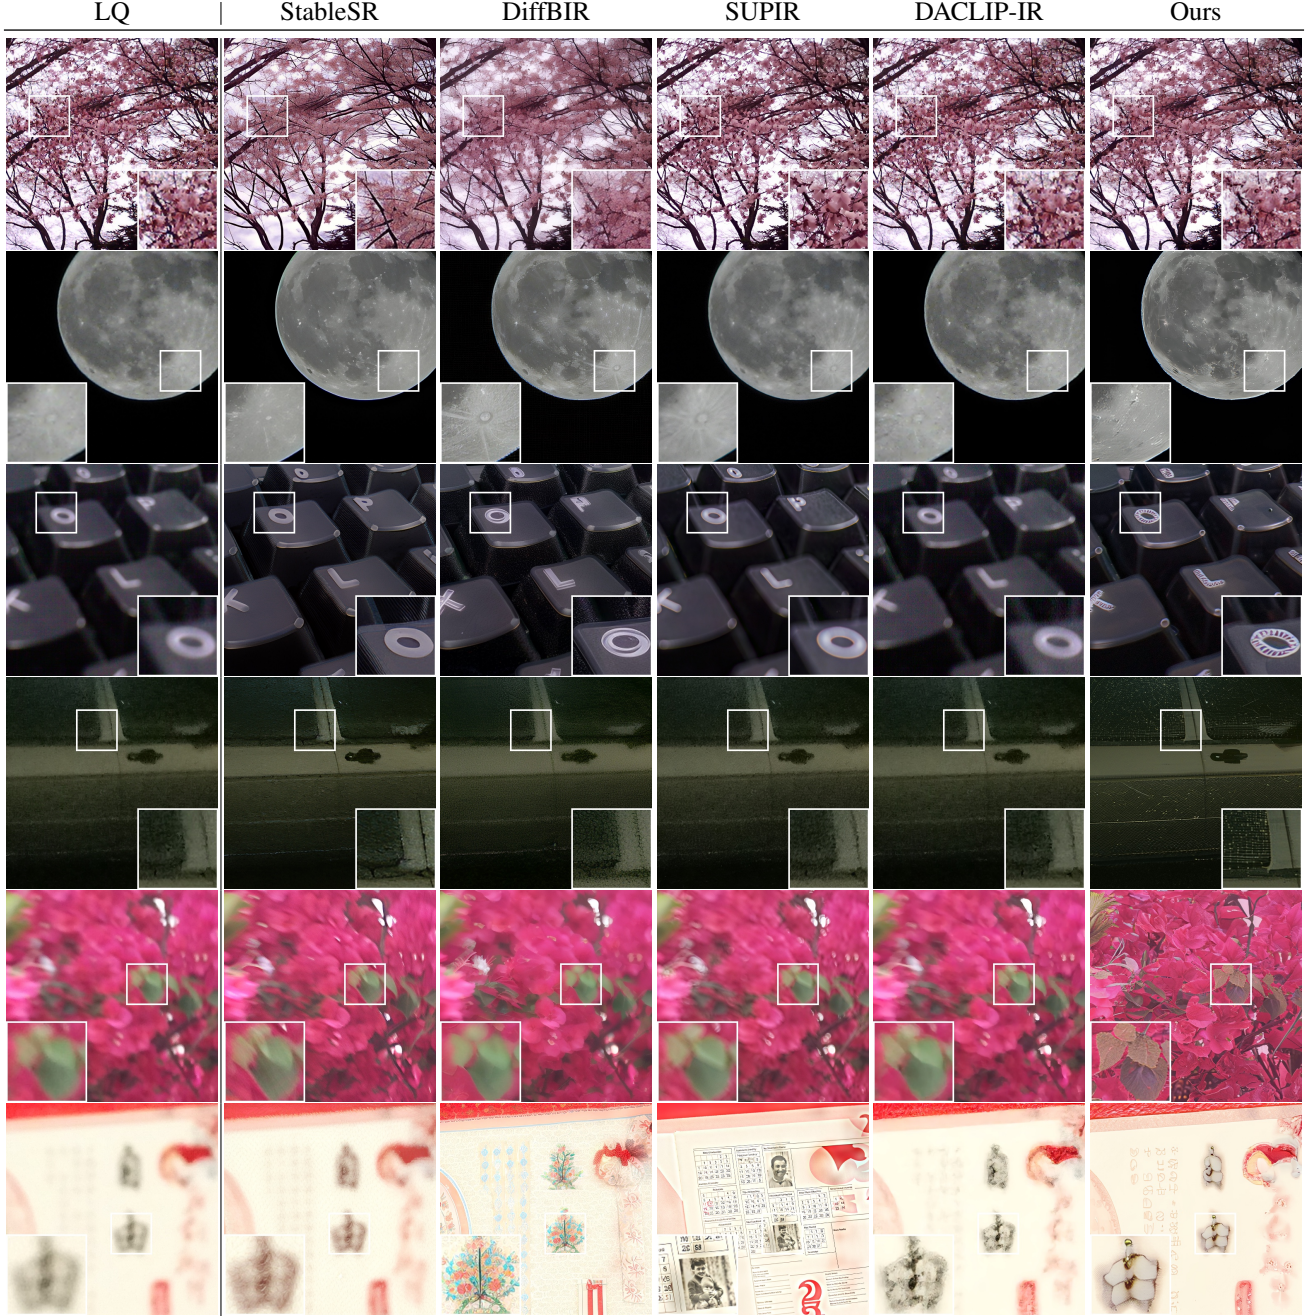

Figure 3. Failure cases on the DiversePhotos $\times$ 1 dataset. *1st row*: our model does not make improvement in image details; *2nd row*: our model (occasionally) fails to keep fidelity while improving resolution; *3rd row*: our model removes noise but fails to remove defocus blur; *4th row*: our model removes noise but introduces non-existing mesh texture; *5th row*: our model removes low resolution and motion blur, but changes the color of the leaves; *6th row*: a hard example on which all models failed to restore.

may occasionally lead to artifacts according to our observation. Extending our proposed method with positive words and negative words is effective.

#### A.8. Limitation of Non-Reference Metrics

Our method employs MUSIQ [11] as an approximation to human perceptual preference for grid search. However, MUSIQ is not fully aligned with human, and can lead to some discrepancies where the grid search result is not visually the



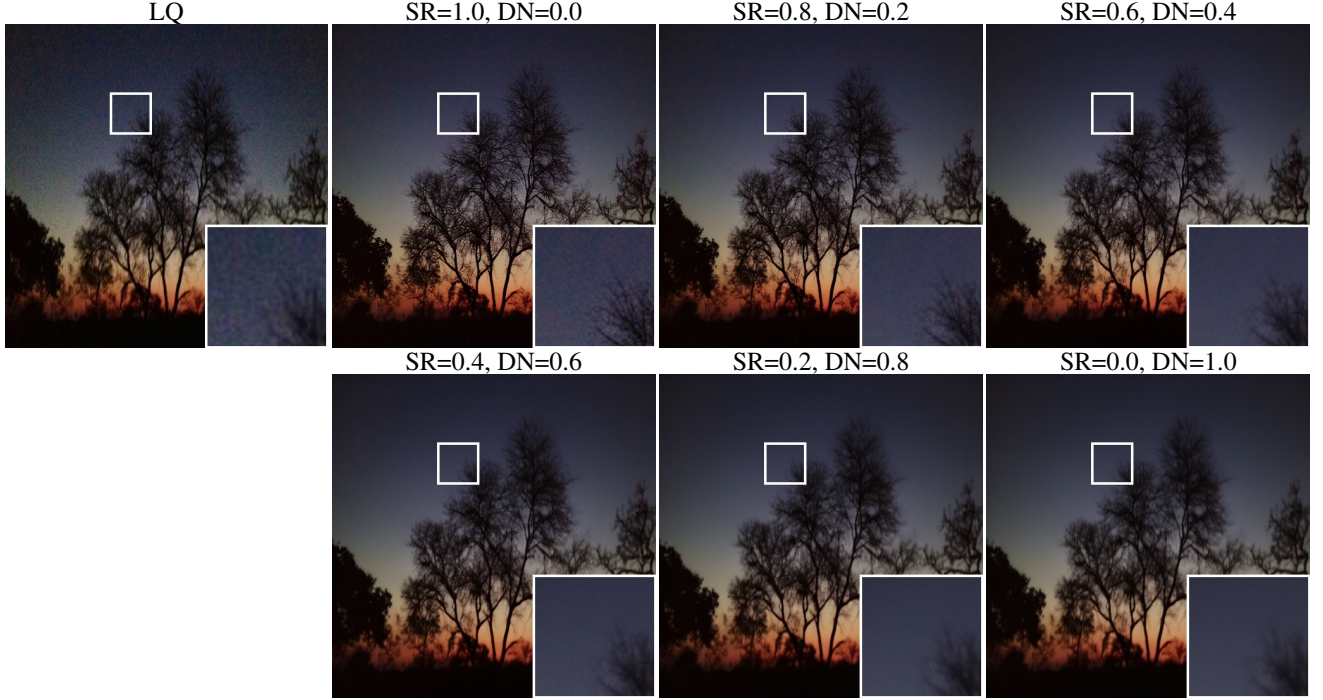

Figure 4. Qualitative demonstration on combination weight sensitivity. In this example, we adjust the weights for super resolution (SR) and denoise (DN), and keep the rest weights to zero. As shown from the images, the SR=1 case can improve the details to the tree, but does not remove all noise. In contrast, the DN=1 case can remove the noise, but not improve the details of the tree. By trading off the two weights, we can observe a smooth trade-off between the two effects. Zoom in for image details.

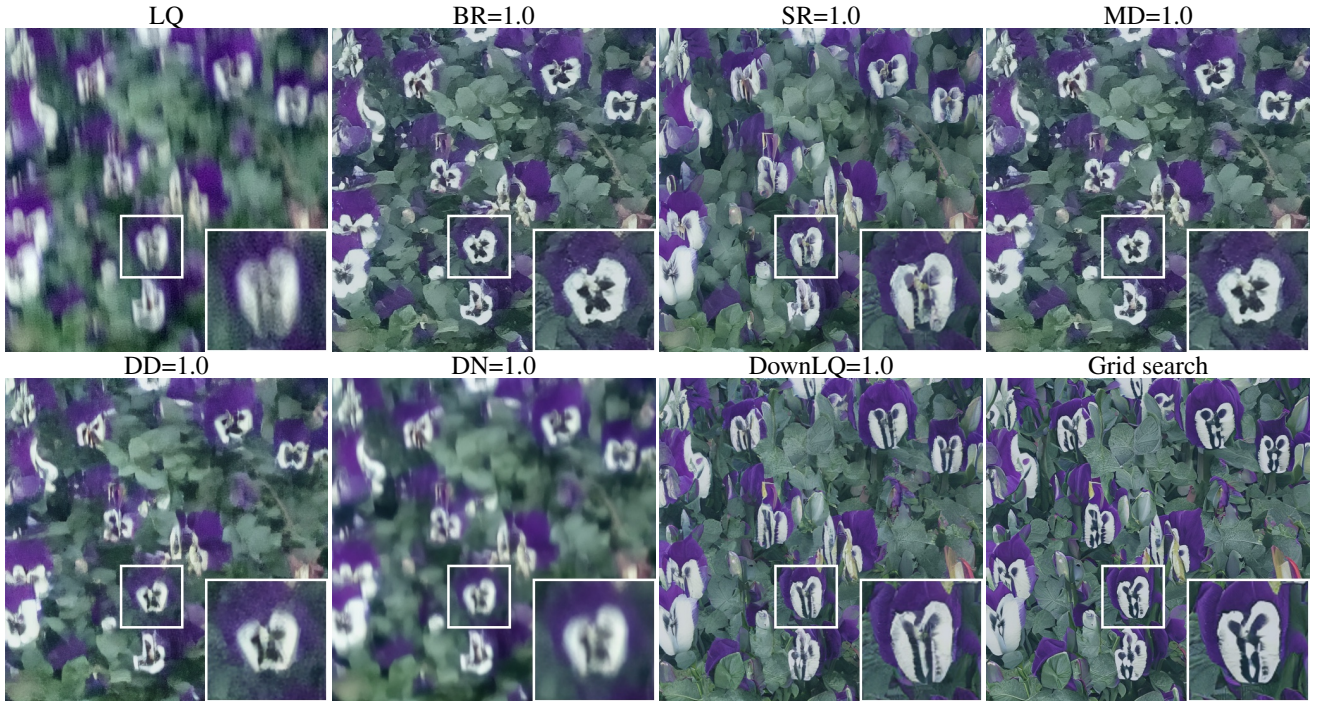

Figure 5. Qualitative demonstration on the same LQ input with different weights. In particular, “SR=1.0” means the weight for super resolution is 1.0, while the rest weights are set to 0.0. Zoom in for image details.



best. An example for such discrepancy is shown in Fig. 7. Potential future work may involve incorporating better image quality metrics.

## A.9. Discussion on Some Technical Details

**How to deal with any-resolution input.** This paper only evaluate  $512 \times 512$  resolution images following StableSR [20] and DiffBIR [15]. Tiling methods (*e.g.*, the one in Fig. 4 in the StableSR paper) can deal with any-resolution images. But tiling method is beyond the scope of paper.

**Why probability (0.32,0.28,0.18,0.22) in Section 4.** This is calculated using the log number of  $512 \times 512$  crops in the training data for the four tasks. We empirically find this slightly better than an equal probability across tasks.

**Why range [-0.2, 1.2] and only one negative weight.** We empirically observe that either a larger range ( $< 0.2$  or  $> 1.2$ ), or allowing more than one negative weight, has a much higher chance for the model to generate visual artifacts.

**How are the frequent combinations chosen in Table 5.** We obtain the (MT-A feature, optimal combination weight) pairs from the 120 additional images (mentioned in the discussion section in the paper). These pairs are then used to train a Random Forest Regressor (from `sklearn.ensemble`). Finally we use the regressor to predict combination weights for DiversePhotos.

## B. Dataset Details

### B.1. DiversePhotos

|           | Low Resolution | Motion Blur | Defocus Blur | Noise | sum |
|-----------|----------------|-------------|--------------|-------|-----|
| SPAQ [6]  | 20             | 17          | 6            | 21    | 64  |
| KONIQ [9] | 14             | 4           | 14           | 8     | 40  |
| LIVE [7]  | 6              | 19          | 20           | 11    | 56  |
| sum       | 40             | 40          | 40           | 40    | 160 |

Table 3. DiversePhotos $\times 1$  Dataset Statistics. It contains 160 images in total, dedicating 40 images for each of the dominating degradation types: low resolution, motion blur, defocus blur, and noise. The table shows the number of images we curated from each public dataset for each degradation.

The ‘‘DiversePhotos’’ dataset is our curation of test images, curated from SPAQ [6], KONIQ [9], and LIVE [7]. The images in DiversePhotos collectively cover multiple mobile devices and DLSR cameras, as well as a wide range of degradations.

**DiversePhotos $\times 1$ .** The DiversePhotos $\times 1$  image set involves 160 images, with 40 images for each dominating degradation: low-resolution, motion blur, defocus blur, and noise. Each image is in  $512 \times 512$  resolution. See Tab. 3 for the statistics.

**DiversePhotos $\times 4$ .** This set of test images are the  $128 \times 128$  center crops of the DiversePhotos $\times 1$  images.

**Steps for reproducing ‘‘DiversePhotos $\times 1$ ’’:**

1. Download SPAQ [6], KONIQ [9], and LIVE [7] datasets.
2. Gather images whose file names are mentioned in the following 12 listings.
3. Center-crop all images from SPAQ and KONIQ datasets to  $512 \times 512$  resolution.
4. Resize (bicubic) all images from LIVE dataset (from  $500 \times 500$ ) to  $512 \times 512$  resolution.

(SPAQ, low resolution as dominating degradation, with other degradations): 00019, 00025, 00033, 00109, 00192, 00226, 00251, 00381, 00414, 00559, 00561, 00585, 00743, 03973, 04085, 04136, 04270, 04317, 04334, 06682.

(SPAQ, motion blur as dominating degradation, with other degradations): 00043, 00075, 00121, 00161, 00175, 00178, 00236, 01868, 03513, 04089, 04272, 04380, 06341, 06863, 10388, 10391, 10495.

(SPAQ, defocus blur as dominating degradation, with other degradations): 00125, 00212, 00282, 04379, 06727, 09121.

(SPAQ, noise as dominating degradation, with other degradations): 00077, 00086, 00096, 00143, 00187, 00199, 00292, 00365, 00450, 04337, 04345, 06485, 06703, 07121, 07162, 07394, 07494, 07866, 07903, 08108, 09682.

(KONIQ, low resolution as dominating degradation, with other degradations): 1755366250, 187640892, 2096424103, 2443117568, 2 6393826, 2704811, 2836089223, 2956548148, 3015139450, 3435545140, 3551648026, 4378419360, 527633229, 86243803.

(KONIQ, motion blur as dominating degradation, with other degradations): 2367261033, 3147416579, 331406867, 62480371.

(KONIQ, defocus blur as dominating degradation, with other degradations): 1306193020, 315889745, 55711788, 1807195948, 206294085, 2166503846, 2214729676, 23371433, 2360058082, 2950983139, 3149433848, 324339500, 427196028, 518080817.

(KONIQ, noise as dominating degradation, with other degradations): 1317678723, 1987196687, 218457399, 2593384818, 2837843986, 2867718050, 3727572481, 4410900135,

(LIVE, low resolution as dominating degradation, with other degradations): 110, 723, 760, 805, 819, 875.

(LIVE, motion blur as dominating degradation, with other degradations): 1017, 104, 1156, 12, 154, 239, 270, 283, 29, 429, 458, 460, 468, 659, 663, 700, 732, 810, 856.

(LIVE, defocus blur as dominating degradation, with other degradations): 337, 550, 592, 698, 713, 714, 717, 731, 737, 750, 751, 787, 788, 855, 862, 873, 874, 876, 884, 887.

(LIVE, noise as dominating degradation, with other degradations): 1001, 1011, 1024, 1037, 1055, 1079, 1098, 1149, 370, 443, 5.

We will provide public download links to the resulting images in the future.

### B.2. OID-Motion

To create a diverse dataset of degraded images, we simulated camera shake blur as described in [5]. This involves generating random blur kernels with a range of intensities and sizes, which were then applied to high-quality images from the Open Image Dataset [12] to simulate per-object motion blur.

We further degraded these images by introducing lens blur (using Gaussian blur kernels), shot noise, read-out noise, and JPEG compression. By randomly sampling the parameters for each degradation, we created a dataset that encompasses a wide spectrum of image quality, from heavily degraded to almost no degradation. Some OID-Motion sample images are shown in Fig. 8.

## References

- [1] Abdelrahman Abdelhamed, Stephen Lin, and Michael S. Brown. A high-quality denoising dataset for smartphone cameras. In *IEEE Conference on Computer Vision and Pattern Recognition (CVPR)*, 2018. 2
- [2] Abdullah Abuolaim and Michael S Brown. Defocus deblurring using dual-pixel data. In *European Conference on Computer Vision*, pages 111–126. Springer, 2020. 2
- [3] Eirikur Agustsson and Radu Timofte. Ntire 2017 challenge on single image super-resolution: Dataset and study. In *The IEEE Conference on Computer Vision and Pattern Recognition (CVPR) Workshops*, 2017. 2
- [4] Liangyu Chen, Xiaojie Chu, Xiangyu Zhang, and Jian Sun. Simple baselines for image restoration. *arXiv preprint arXiv:2204.04676*, 2022. 2
- [5] Mauricio Delbracio and Guillermo Sapiro. Burst deblurring: Removing camera shake through fourier burst accumulation. In *IEEE Conference on Computer Vision and Pattern Recognition*, pages 2385–2393, 2015. 7, 10
- [6] Yuming Fang, Hanwei Zhu, Yan Zeng, Kede Ma, and Zhou Wang. Perceptual quality assessment of smartphone photography. In *IEEE Conference on Computer Vision and Pattern Recognition*, pages 3677–3686, 2020. 7
- [7] Deepti Ghadiyaram and Alan C. Bovik. Massive online crowdsourced study of subjective and objective picture quality. *IEEE Transactions on Image Processing*, 25(1):372–387, 2016. 7
- [8] Jonathan Ho and Tim Salimans. Classifier-free diffusion guidance, 2022. 2
- [9] V. Hosu, H. Lin, T. Sziranyi, and D. Saupe. Koniq-10k: An ecologically valid database for deep learning of blind image quality assessment. *IEEE Transactions on Image Processing*, 29:4041–4056, 2020. 7
- [10] Yitong Jiang, Zhaoyang Zhang, Tianfan Xue, and Jinwei Gu. Autodir: Automatic all-in-one image restoration with latent diffusion, 2024. 1, 2
- [11] Junjie Ke, Qifei Wang, Yilin Wang, Peyman Milanfar, and Feng Yang. Musiq: Multi-scale image quality transformer, 2021. 5
- [12] Alina Kuznetsova, Hassan Rom, Neil Alldrin, Jasper Uijlings, Ivan Krasin, Jordi Pont-Tuset, Shahab Kamali, Stefan Popov, Matteo Mallocci, Alexander Kolesnikov, Tom Duerig, and Vittorio Ferrari. The open images dataset v4: Unified image classification, object detection, and visual relationship detection at scale. *International Journal of Computer Vision*, 128(7):1956–1981, 2020. 7, 10
- [13] Boyun Li, Xiao Liu, Peng Hu, Zhongqin Wu, Jiancheng Lv, and Xi Peng. All-In-One Image Restoration for Unknown Corruption. In *IEEE Conference on Computer Vision and Pattern Recognition*, New Orleans, LA, 2022. 2
- [14] Jingyun Liang, Jiezhong Cao, Guolei Sun, Kai Zhang, Luc Van Gool, and Radu Timofte. Swinir: Image restoration using swin transformer, 2021. 2
- [15] Xinqi Lin, Jingwen He, Ziyang Chen, Zhaoyang Lyu, Bo Dai, Fanghua Yu, Wanli Ouyang, Yu Qiao, and Chao Dong. Diffbir: Towards blind image restoration with generative diffusion prior, 2024. 1, 2, 3, 7
- [16] Ziwei Luo, Fredrik K Gustafsson, Zheng Zhao, Jens Sjölund, and Thomas B Schön. Photo-realistic image restoration in the wild with controlled vision-language models. *arXiv preprint arXiv:2404.09732*, 2024. 2
- [17] Seungjun Nah, Tae Hyun Kim, and Kyoung Mu Lee. Deep multi-scale convolutional neural network for dynamic scene deblurring. In *CVPR*, 2017. 2
- [18] Vaishnav Potlapalli, Syed Waqas Zamir, Salman Khan, and Fahad Khan. Promptir: Prompting for all-in-one image restoration. In *Thirty-seventh Conference on Neural Information Processing Systems*, 2023. 1, 2
- [19] Chu-Jie Qin, Rui-Qi Wu, Zikun Liu, Xin Lin, Chun-Le Guo, Hyun Hee Park, and Chongyi Li. Restore anything with masks: Leveraging mask image modeling for blind all-in-one image restoration, 2024. 2
- [20] Jianyi Wang, Zongsheng Yue, Shangchen Zhou, Kelvin C.K. Chan, and Chen Change Loy. Exploiting diffusion prior for real-world image super-resolution. *International Journal of Computer Vision*, 2024. 2, 7
- [21] Fanghua Yu, Jinjin Gu, Zheyuan Li, Jinfan Hu, Xiangtao Kong, Xintao Wang, Jingwen He, Yu Qiao, and Chao Dong. Scaling up to excellence: Practicing model scaling for photo-realistic image restoration in the wild, 2024. 1, 2, 3, 4
- [22] Syed Waqas Zamir, Aditya Arora, Salman Khan, Munawar Hayat, Fahad Shahbaz Khan, and Ming-Hsuan Yang. Restormer: Efficient transformer for high-resolution image restoration, 2022. 2



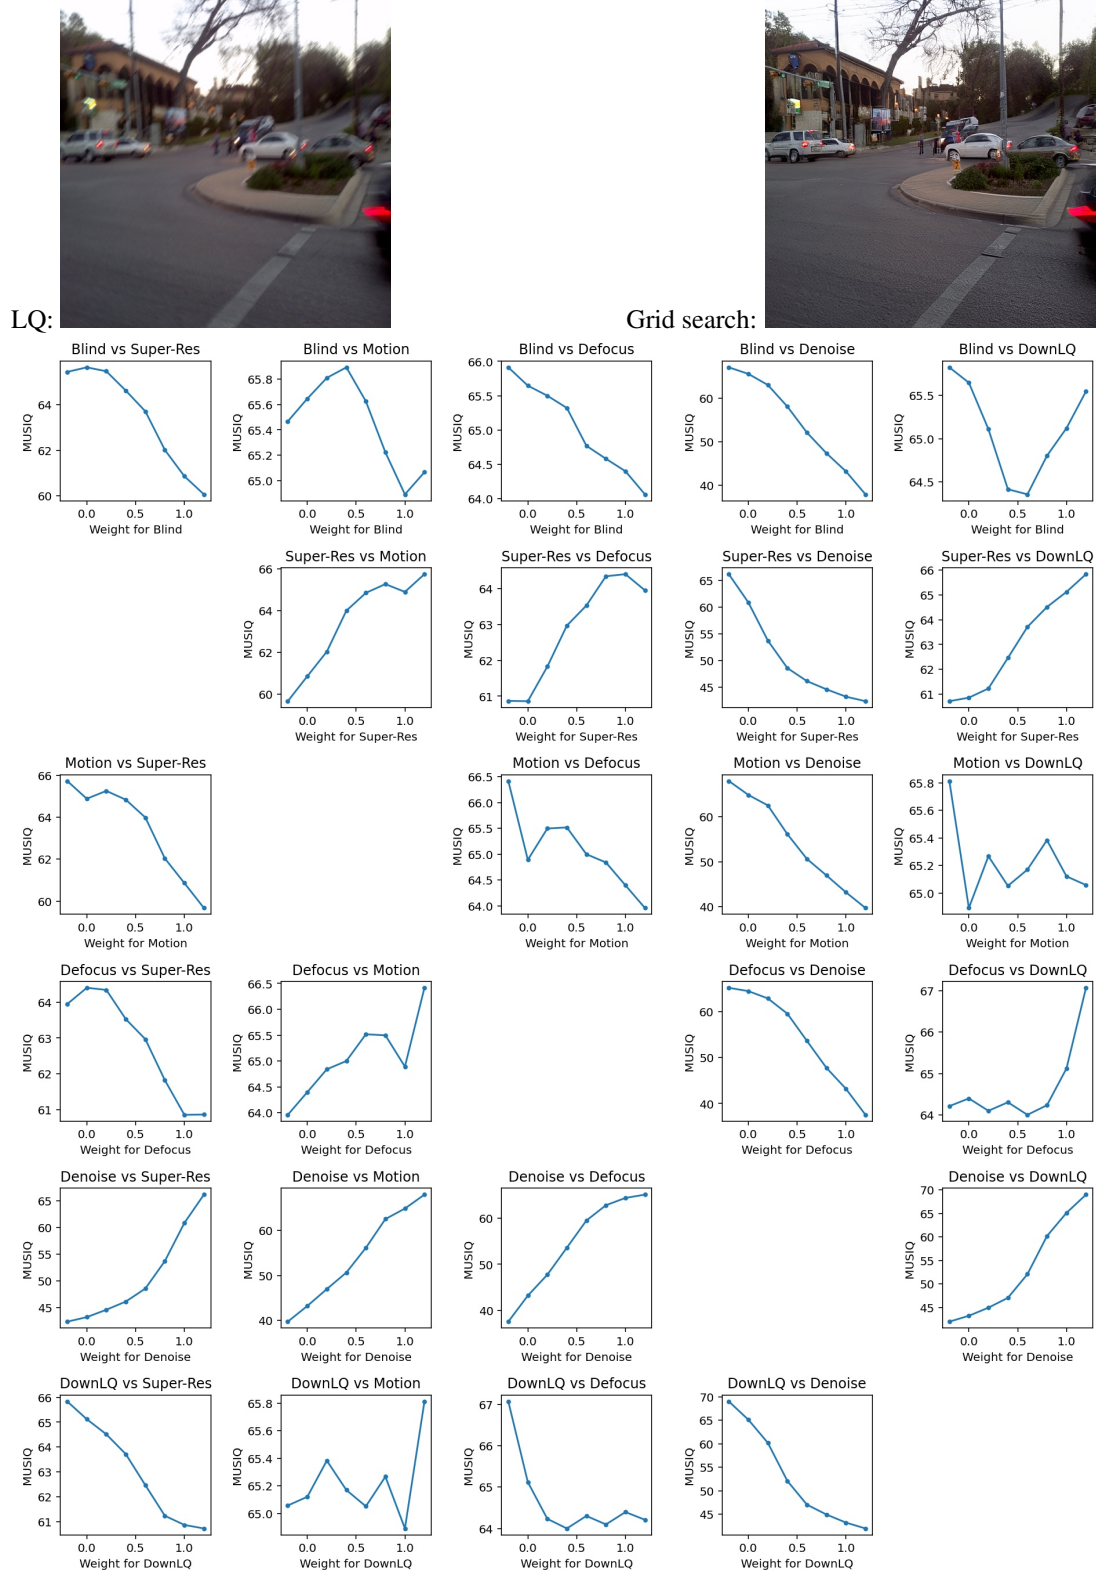

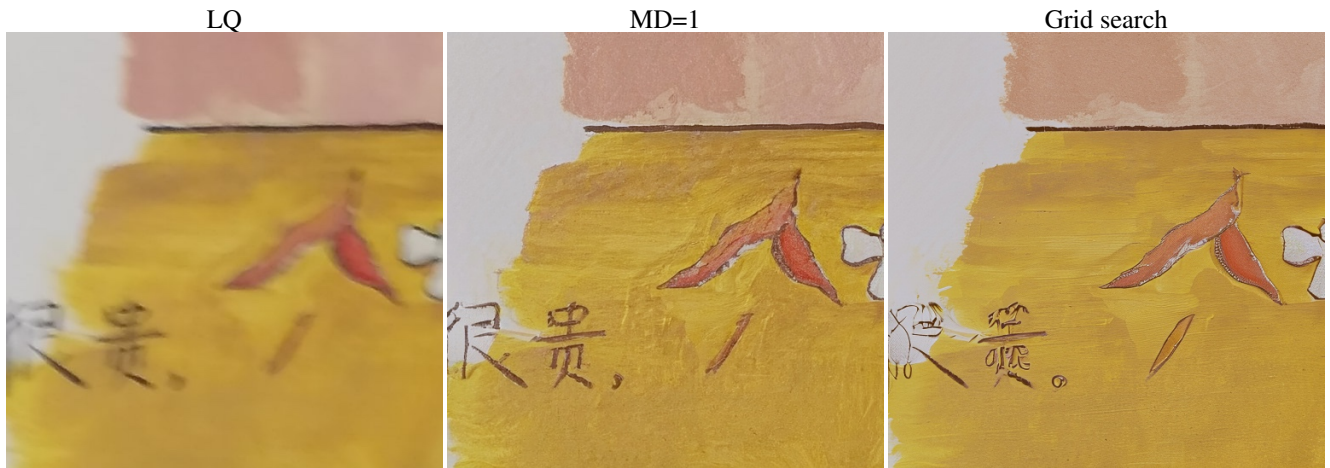

Figure 7. Demonstration of the occasional discrepancy between human preference and non-reference metric. The grid search result (right) removes motion blur from the LQ (left), but also impacts fidelity. However, by manually setting the weight for motion deblur (MD) to 1 and the rest to zero, a visually better result can be obtained (middle). This is an example where non-reference metric is not fully aligned with human preference.

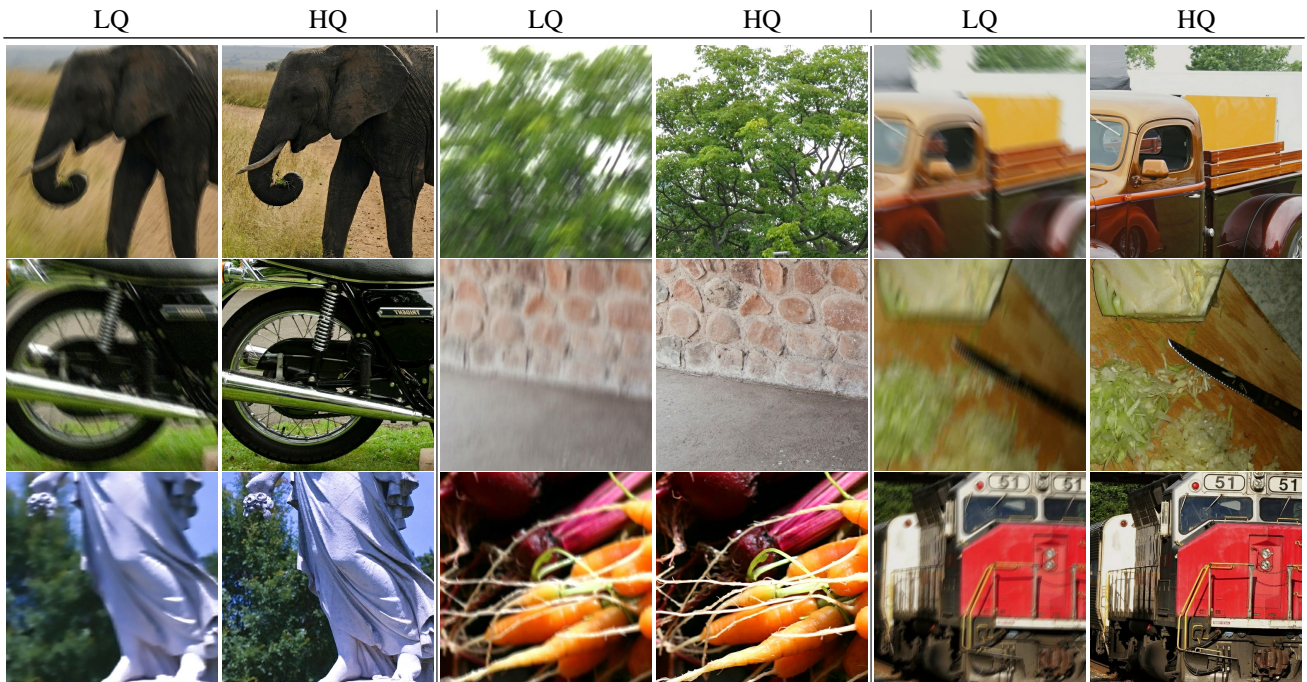

Figure 8. Samples from the OID-Motion training dataset. It is simulated with the camera shake blur [5] on the Open Image Dataset [12].
